# Supplementary material for: Isolation, Physicochemical Properties, and Structural Characteristics of Arabinoxylan from Hull-Less Barley
Source: MDPI journal article supplement (doi:10.3390/molecules26103026), 2021-05-19
Supplement: s1 [file s1]

## Supplemental Data

**Figure S1.** SEM images of HBAX in hull-less barley: a) 3000 × and b) 5000 ×.

**Figure S2.** FT-IR spectrum of HBAX in hull-less barley.

**Figure S3.** The total ion chromatography of PMAAs derivatives (a) and mass spectra (b–m) of HBAX-60. b: 1,4-di-*O*-acetyl-2,3,5-tri-*O*-methyl arabinitol; c: 1,5-di-*O*-acetyl-2,3,4-tri-*O*-methyl xylitol; d: 1,2,4-tri-*O*-acetyl-3,5-di-*O*-methyl arabinitol; e: 1,5-di-*O*-acetyl-2,3,4,6-tetra-*O*-methyl glucitol; f: 1,3,4-tri-*O*-acetyl-2,5-di-*O*-methyl arabinitol; g: 1,4,5-tri-*O*-acetyl-2,3-di-*O*-methyl arabinitol; h: 1,4,5-tri-*O*-acetyl-2,3-di-*O*-methyl xylitol; i: 1,3,5-tri-*O*-acetyl-2,4,6-tri-*O*-methyl glucitol; j: 1,4,5-tri-*O*-acetyl-2,3,6-tri-*O*-methyl glucitol; k: 1,2,4,5-tera-*O*-acetyl-3-*O*-methyl xylitol; l: 1,3,4,5-tri-*O*-acetyl-2-*O*-methyl xylitol; and m: 1,2,3,4,5-penta-*O*-acetyl-xylitol. The PMAAs were derived from individual sugars, e.g., 1,5-di-*O*-acetyl-2,3,4-tri-*O*-methyl xylitol means that xylose was methylated at the *O*-2,3,4 sites and acetyled at the *O*-1,5 sites, which indicates that the corresponding linkage pattern was Xylp-(1→.

**Figure S4.** TOCSY (a) and NOESY (b) spectra of HBAX-60.

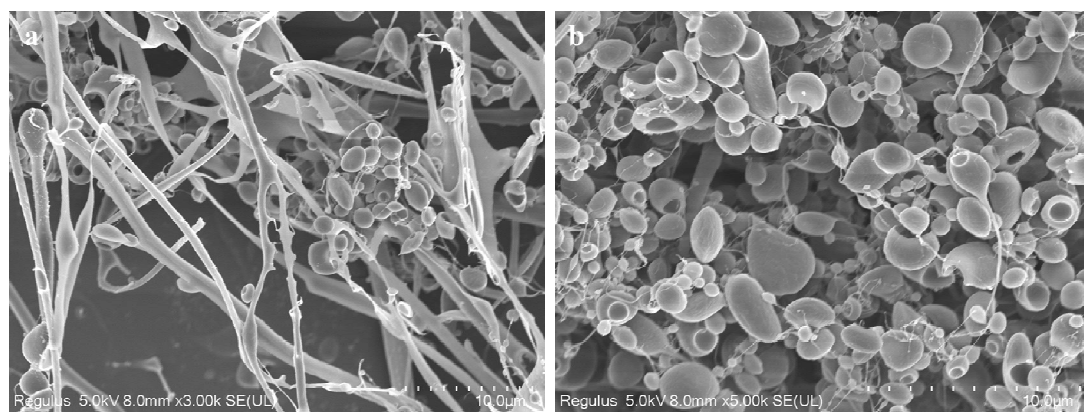

**Figure S1.** SEM images of HBAX in hull-less barley: (a) 3000 × and (b) 5000 ×.

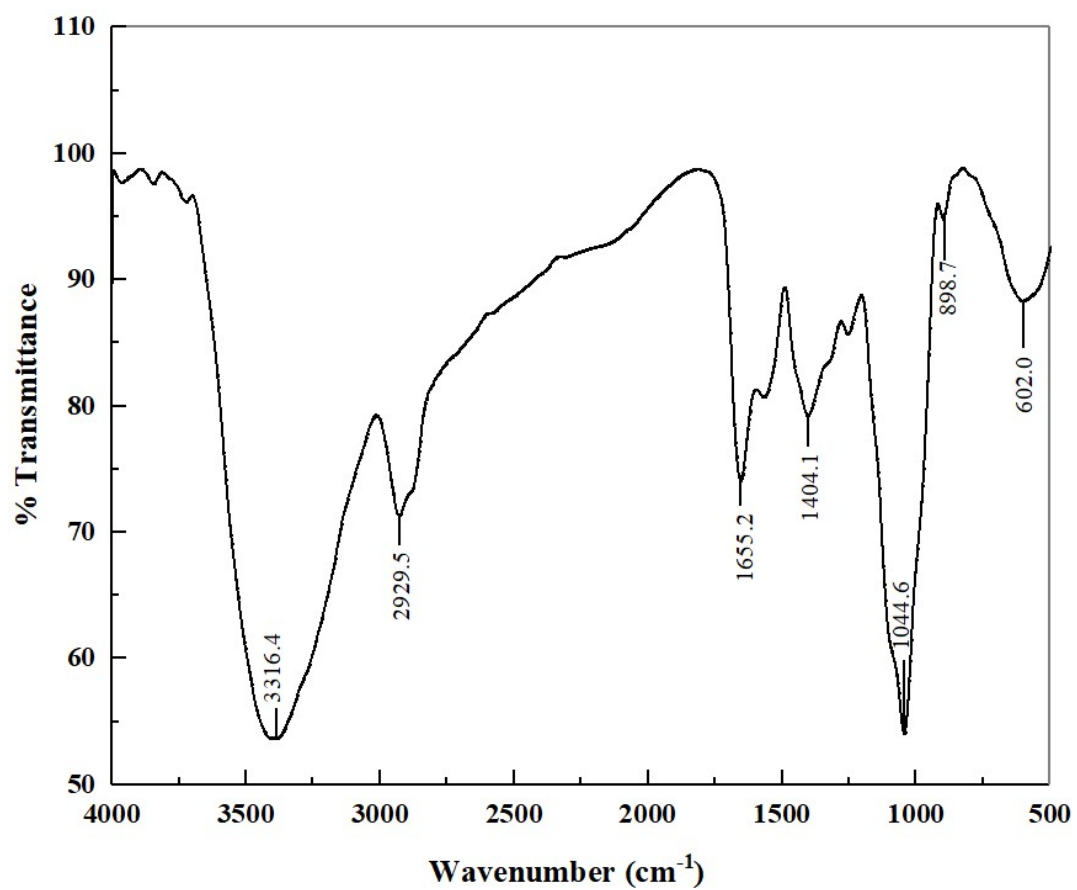

Figure S2. FT-IR spectrum of HBAX in hull-less barley.

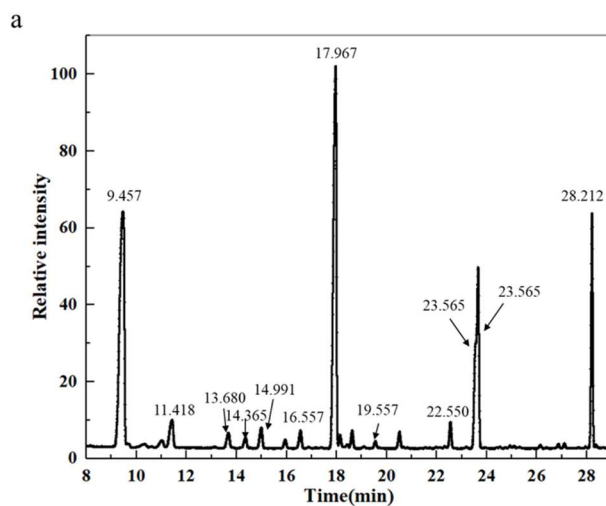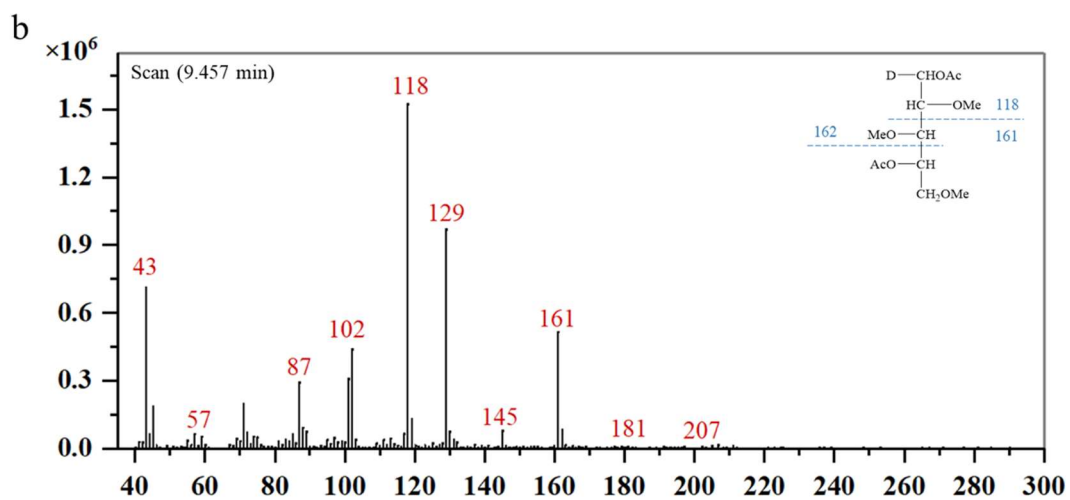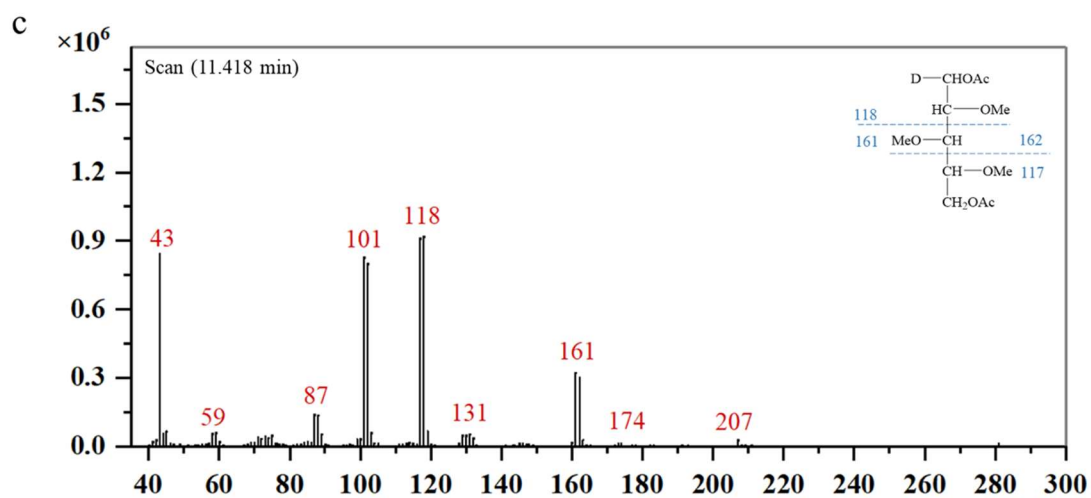

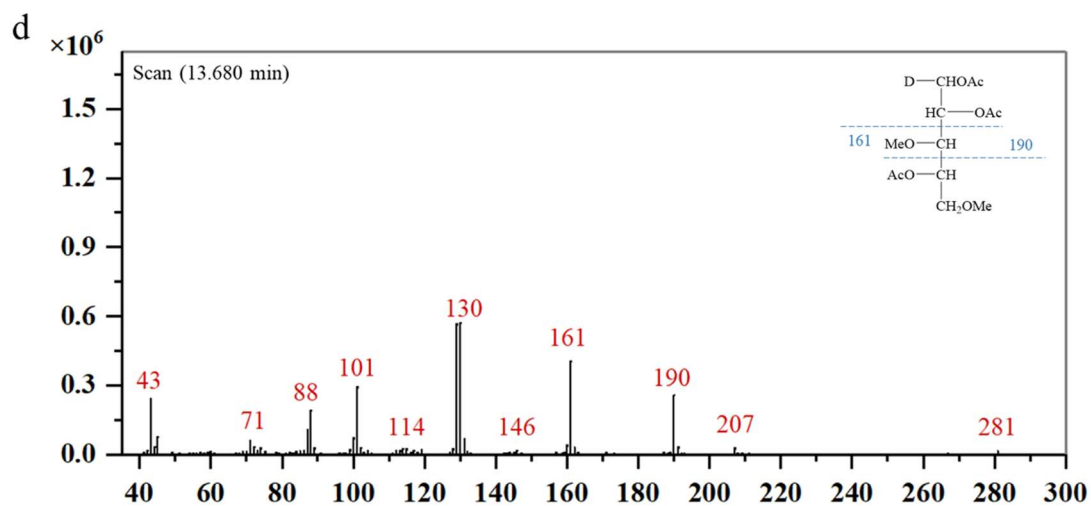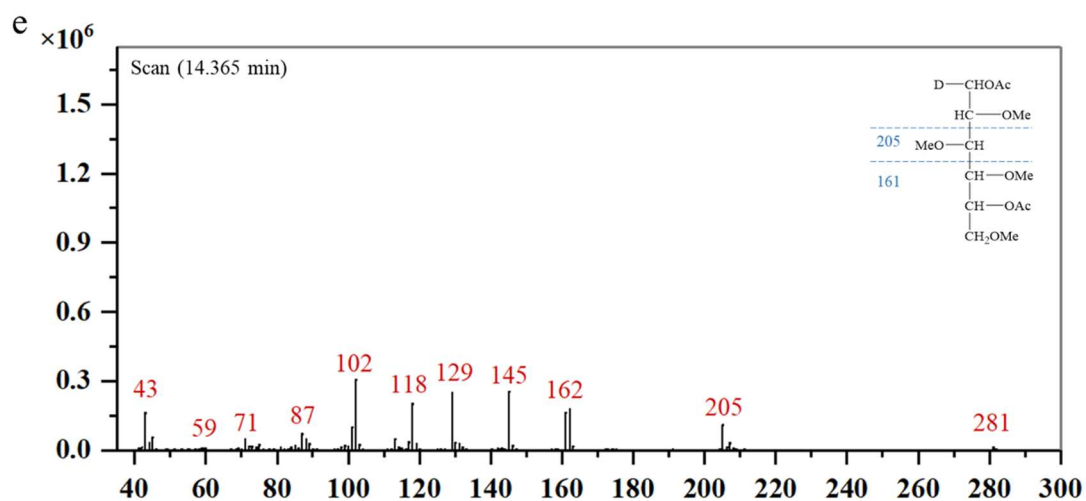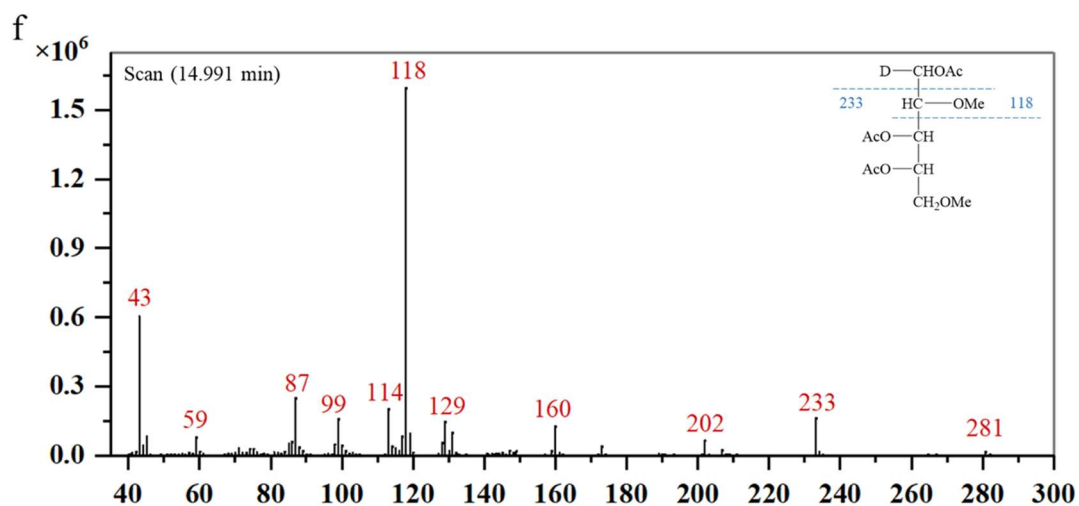

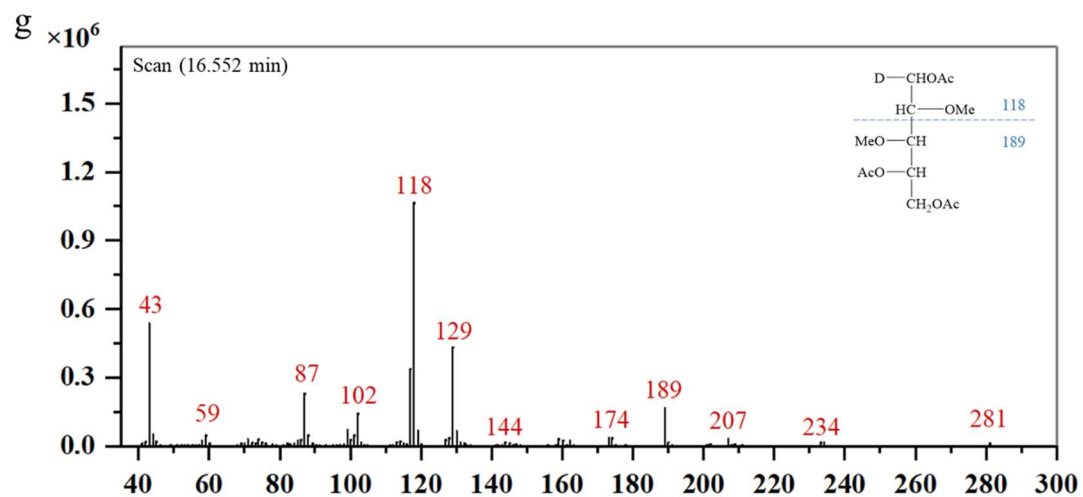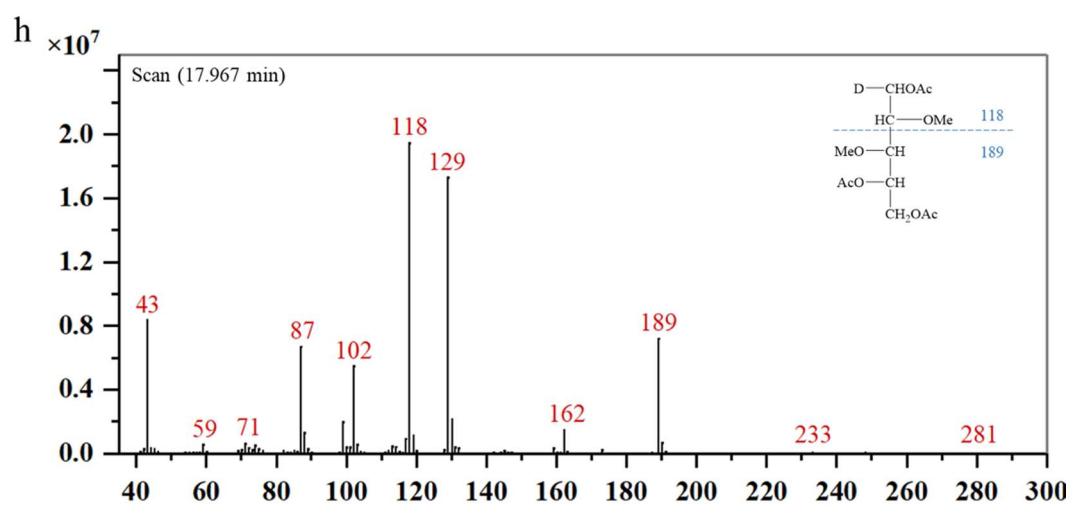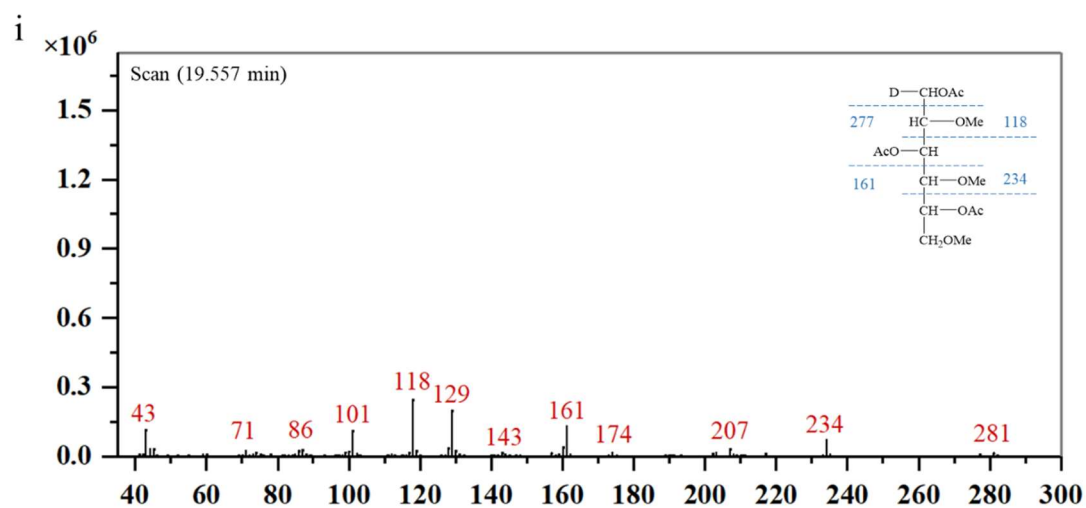

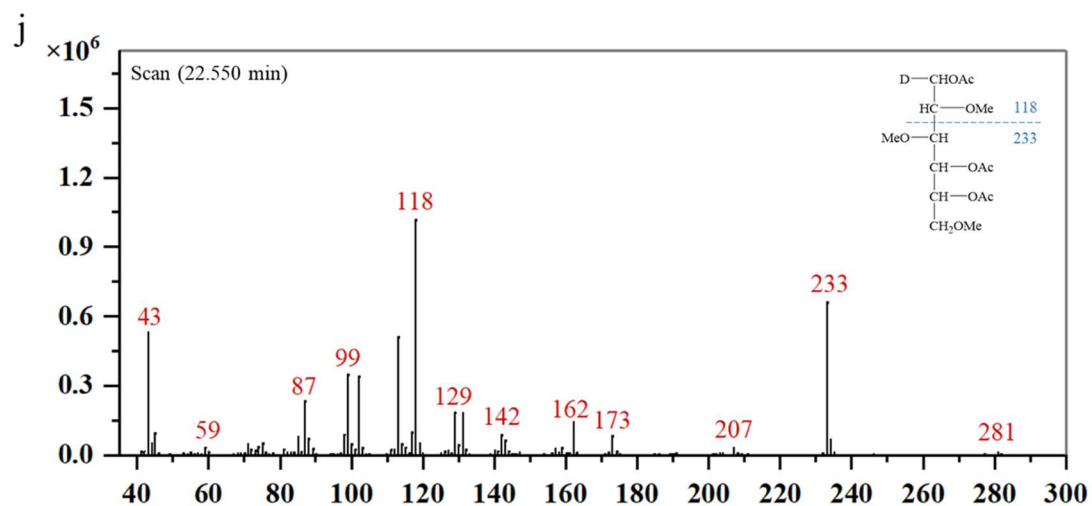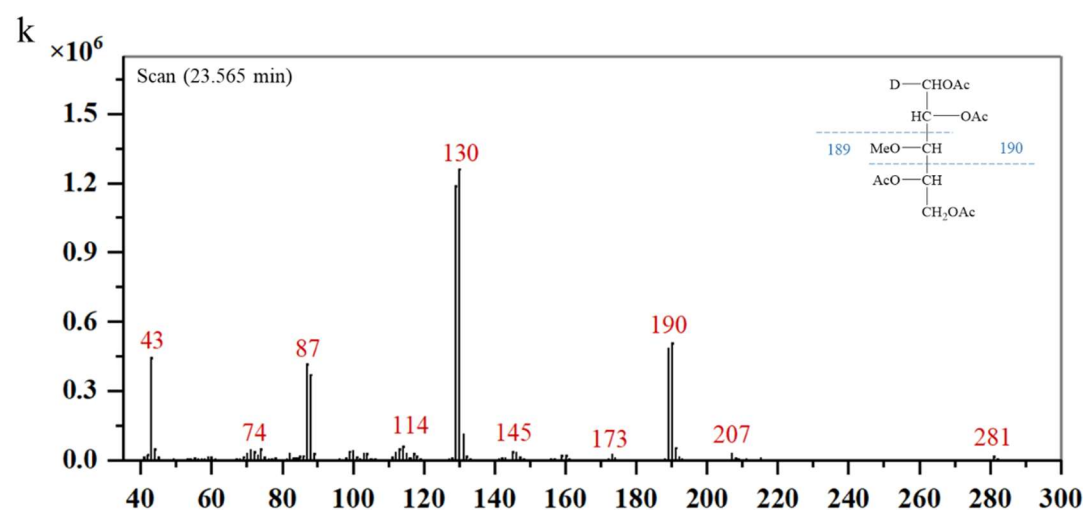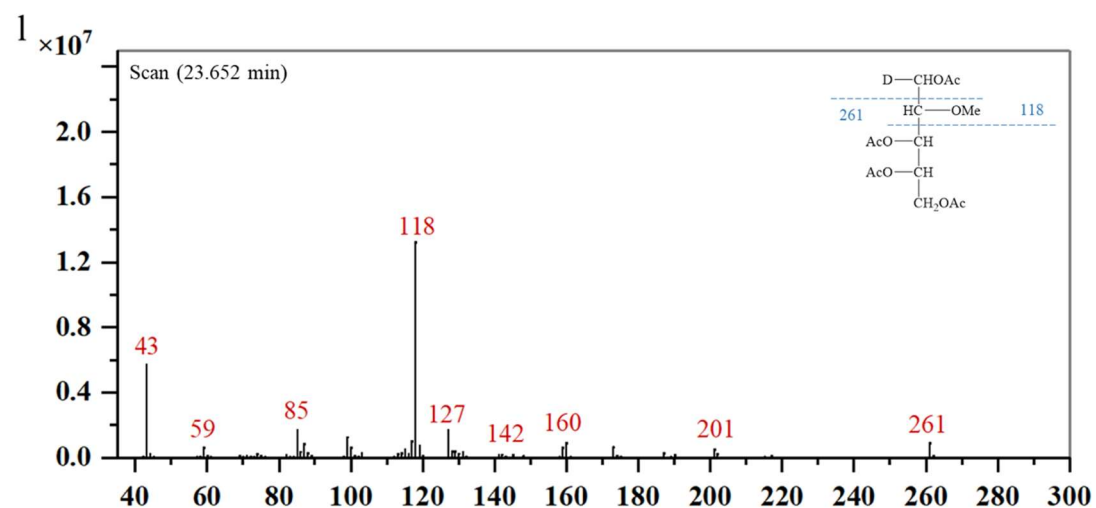

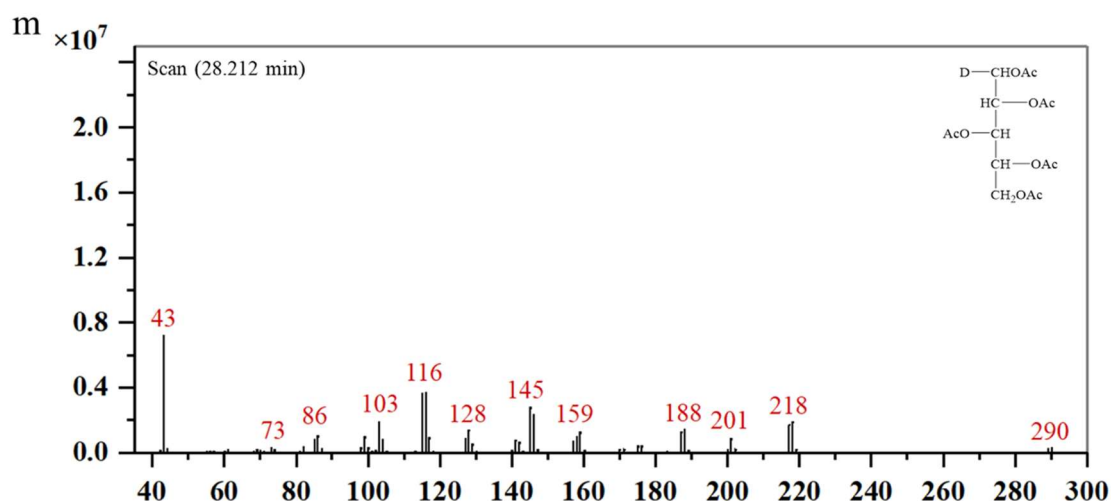

**Figure S3.** The results of methylation analysis. (a) Total ion chromatography of the PMAAs derivatives; (b–m) mass fragments of each linkage pattern: (b) 1,4-di-*O*-acetyl-2,3,5-tri-*O*-methyl arabinitol; (c) 1,5-di-*O*-acetyl-2,3,4-tri-*O*-methyl xylitol; (d) 1,2,4-tri-*O*-acetyl-3,5-di-*O*-methyl arabinitol; (e) 1,5-di-*O*-acetyl-2,3,4,6-tetra-*O*-methyl glucitol; (f) 1,3,4-tri-*O*-acetyl-2,5-di-*O*-methyl arabinitol; (g) 1,4,5-tri-*O*-acetyl-2,3-di-*O*-methyl arabinitol; (h) 1,4,5-tri-*O*-acetyl-2,3-di-*O*-methyl xylitol; (i) 1,3,5-tri-*O*-acetyl-2,4,6-tri-*O*-methyl glucitol; (j) 1,4,5-tri-*O*-acetyl-2,3,6-tri-*O*-methyl glucitol; (k) 1,2,4,5-tera-*O*-acetyl-3-*O*-methyl xylitol; (l) 1,3,4,5-tri-*O*-acetyl-2-*O*-methyl xylitol; (m): 1,2,3,4,5-penta-*O*-acetyl-xylitol. The PMAAs were derived from individual sugars, e.g., 1,5-di-*O*-acetyl-2,3,4-tri-*O*-methyl xylitol means that xylose was methylated at the *O*-2,3,4 sites and acetylated at the *O*-1,5 sites, which indicates that the corresponding linkage pattern was Xylp-(1→.



a

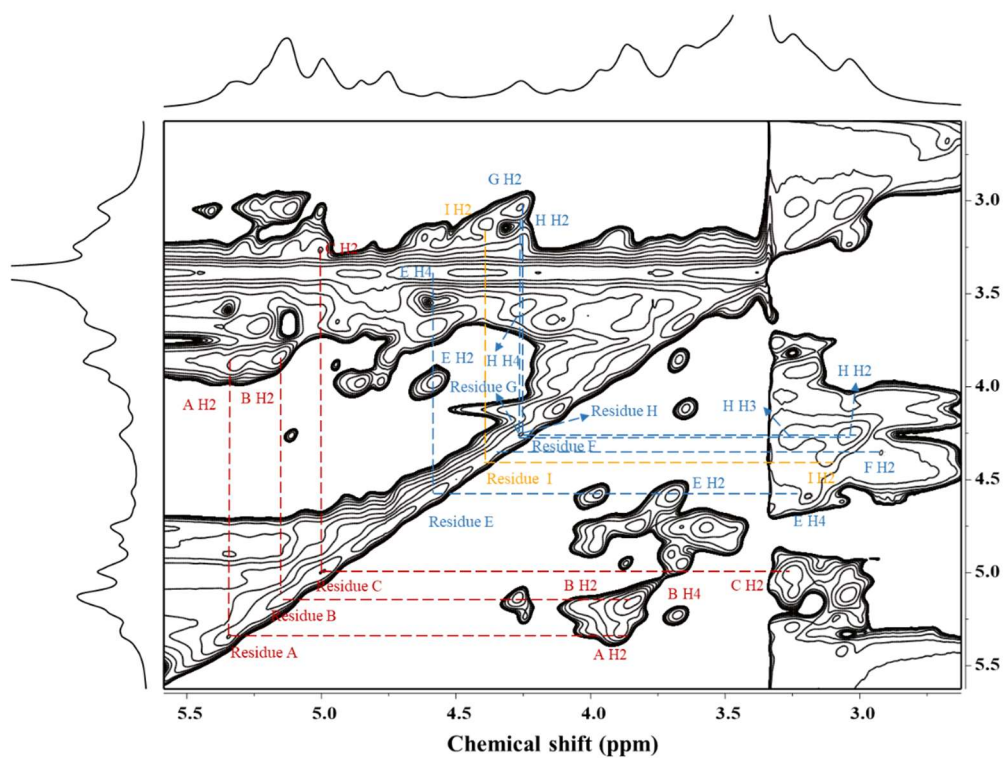

b

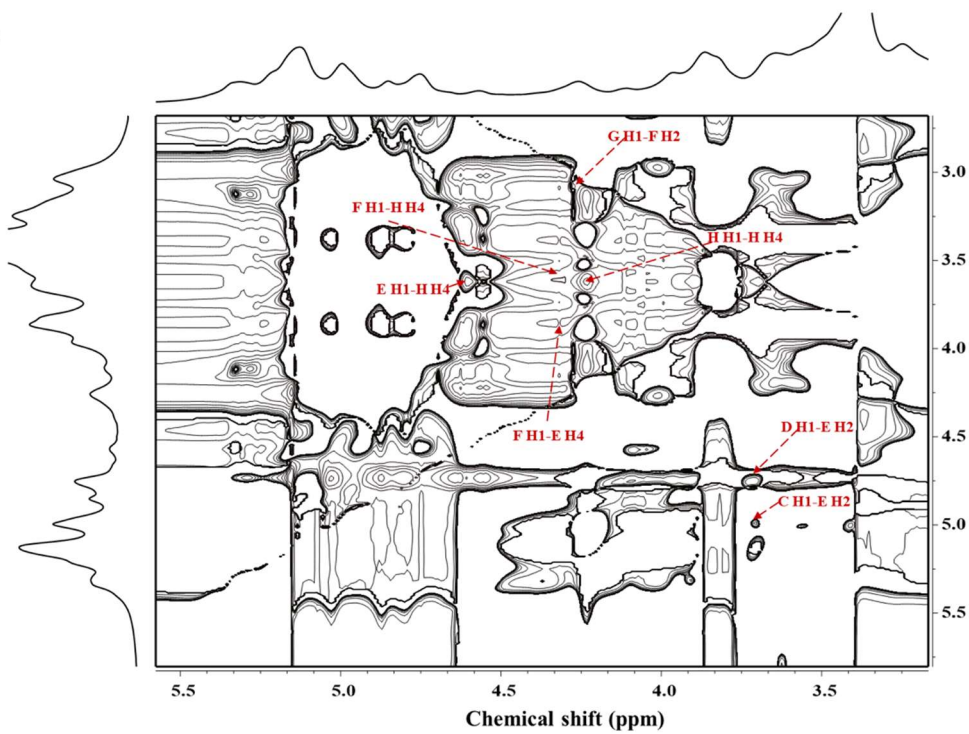

**Figure S4.** NMR spectra of HBAX-60: (a) TOCSY NMR spectrum; (b) NOESY NMR spectrum.
